# Supplementary material for: Transgenerational epimutations induced by multi-generation drought imposition mediate rice plant’s adaptation to drought condition
Source: PubMed Central journal article supplement (PMC5209664; doi:10.1038/srep39843), 2017-01-04
Supplement: srep39843-s1.pdf [file srep39843-s1.pdf]

Transgenerational epimutations induced by multi-generation drought  
imposition mediate rice plant's adaptation to drought condition

Xiaoguo Zheng<sup>1,2,†</sup>, Liang Chen<sup>1,†</sup>, Hui Xia<sup>1</sup>, Haibin Wei<sup>1</sup>, Qiaojun Lou<sup>1</sup>, Mingshou Li<sup>1</sup>,  
Tiemei Li<sup>1</sup> and Lijun Luo<sup>1,2\*</sup>

<sup>1</sup> Shanghai Agrobiological Gene Center, Shanghai, China

<sup>2</sup> College of Plant Sciences and Technology, Huazhong Agricultural University, Wuhan,  
China

\*Corresponding author E-mail: [lijun@sagc.org.cn](mailto:lijun@sagc.org.cn).

† These authors contributed equally to this work.

**Supplementary Figure S1. Scheme of samples used in this study.** (A) Original generations (G0s) of both Huhan3 and II-32B were propagated by single-seed descent for 11 generations, with drought exposure from tillering stage to seed filling stage, which is when drought has the largest impact on yield under natural conditions. In addition, the G10 generation was cultivated under well-watered conditions for one more generation to obtain a recovery generation, G10R1. (B) Analysis was based on two biological replicates (sibling plants) of each sample. (C) PVC cylinders used in this study.

**Supplementary Figure S2. Hierarchical clusters according to epimutations between D0 and W0 in all contexts.** Clusters according to DMPs (A), SMPs (C) and DMRs (E) in Huhan3, and according to DMPs (B), SMPs (D) and DMRs (F) in II-32B.

**Supplementary Figure S3. Hierarchical clusters according to epimutations between D10 and W0 in all contexts.** Clusters according to DMPs (A), SMPs (C) and DMRs (E) in Huhan3, and according to DMPs (B), SMPs (D) and DMRs (F) in II-32B.

**Supplementary Figure S4. Epimutations between well-watered and drought-treated plants.** (A) Drought-induced DMPs in Huhan3. (B) Drought-induced DMPs in II-32B. (C) Distribution of DMPs whose recurrent frequencies  $\geq 3$  on genic regions in Huhan3. (D) Distribution of DMPs whose recurrent frequencies  $\geq 3$  on genic regions in II-32B. (E) Drought-induced SMPs in Huhan3. (F) Drought-induced SMPs in II-32B. (G) Distribution of SMPs whose recurrent frequencies  $\geq 3$  on genic regions in Huhan3. (H) Distribution of SMPs whose recurrent frequencies  $\geq 3$  on genic regions in II-32B. (I) Drought-induced DMRs in Huhan3. (J) Drought-induced DMRs in II-32B. (K) Distribution of recurrent DMRs on genic regions in Huhan3. (L) Distribution of recurrent DMRs on genic regions in II-32B.

**Supplementary Figure S5. Transgenerational inheritance of accumulated epimutations.** (A) Transgenerational accumulated DMPs in Huhan3. (B) Transgenerational accumulated DMPs in II-32B. (C) Distribution of transgenerational accumulated DMPs on genic regions in Huhan3. (D) Distribution of transgenerational accumulated DMPs on genic regions in II-32B. (E) Transgenerational accumulated SMPs in Huhan3. (F) Transgenerational accumulated SMPs in II-32B. (G) Distribution of transgenerational accumulated SMPs on genic regions in Huhan3. (H) Distribution of transgenerational accumulated SMPs on genic regions in II-32B. (I) Transgenerational accumulated DMRs in II-32B. (J) Heatmap according to DNA methylation level of transgenerational accumulated DMRs in different generations of II-32B.

**Supplementary Figure S6. DNA methylation variations between G0 and G11 in all contexts in promoter regions, 5'UTR, gene bodies, CDS and 3'UTR of drought responsive genes of Huhan3.**

**Supplementary Figure S7. DNA methylation variations between G0 and G11 in all contexts in promoter regions, 5'UTR, gene bodies, CDS and 3'UTR of drought responsive genes of II-32B.**

**Supplementary Figure S8. DNA methylation patterns of gene bodies and TEs with their 1 Kb flanking sequences.** Gene bodies and TEs were divided equally into ten pieces, and their 1-Kb flanking sequences on both sides were divided equally into five pieces. Distribution of DNA methylation level in gene bodies of each strain of Huhan3 (A) and of II-32B (B). Distribution of DNA methylation level in TEs of each strain of Huhan3 (C) and of II-32B (D).

**Supplementary Figure S9. Using MSRE-qPCR and RT-qPCR to confirm WGBS data and mRNA-seq data, respectively.** (A) DNA methylation level of cytosine at chr7:4054474 from WGBS data. (B) DNA methylation level of cytosine at chr7:4054474 from MSRE-qPCR data. (C)

Relative expression level of *LOC\_Os07g08000*. (D) Relative expression level of *LOC\_Os01g55450*.

**Supplementary Figure S10. Agronomic characters of G0 and G11 under both normal and drought conditions.** (A) Biological yield (dry weight of whole plants) per tiller. (B) Thousands kernel weight. (C) Kernel length. (D) Kernel width.



Figure S2

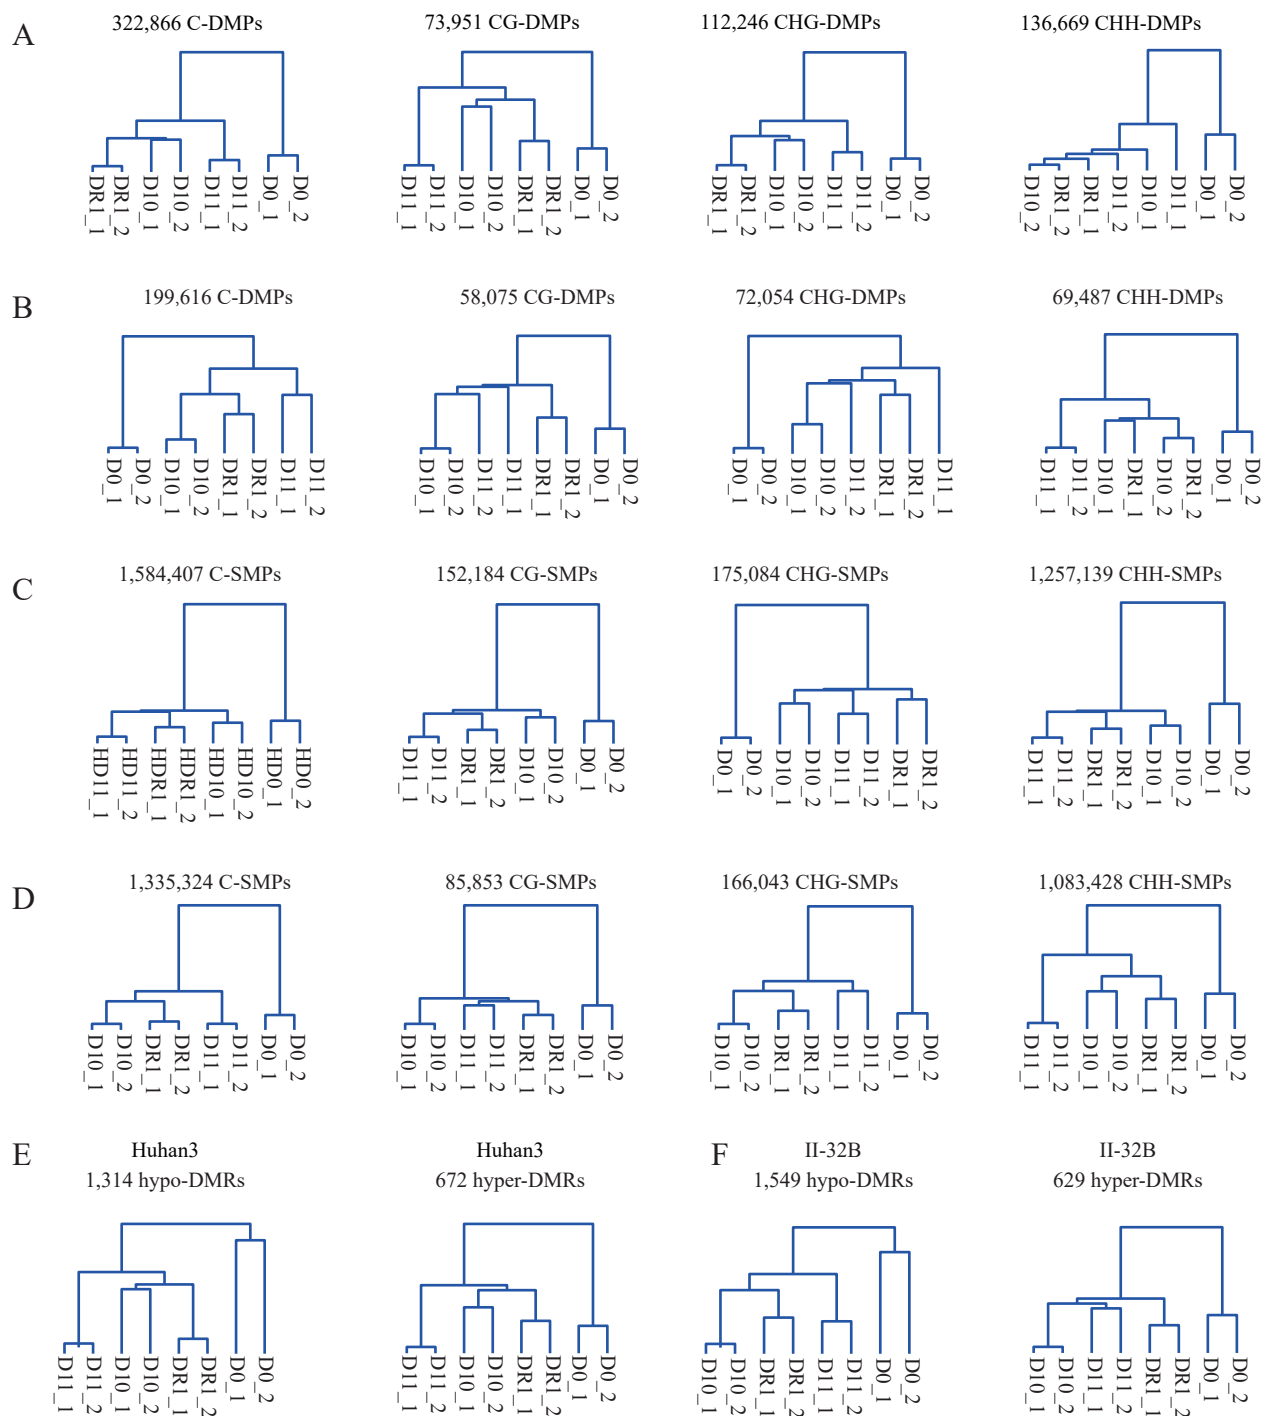



Figure S4

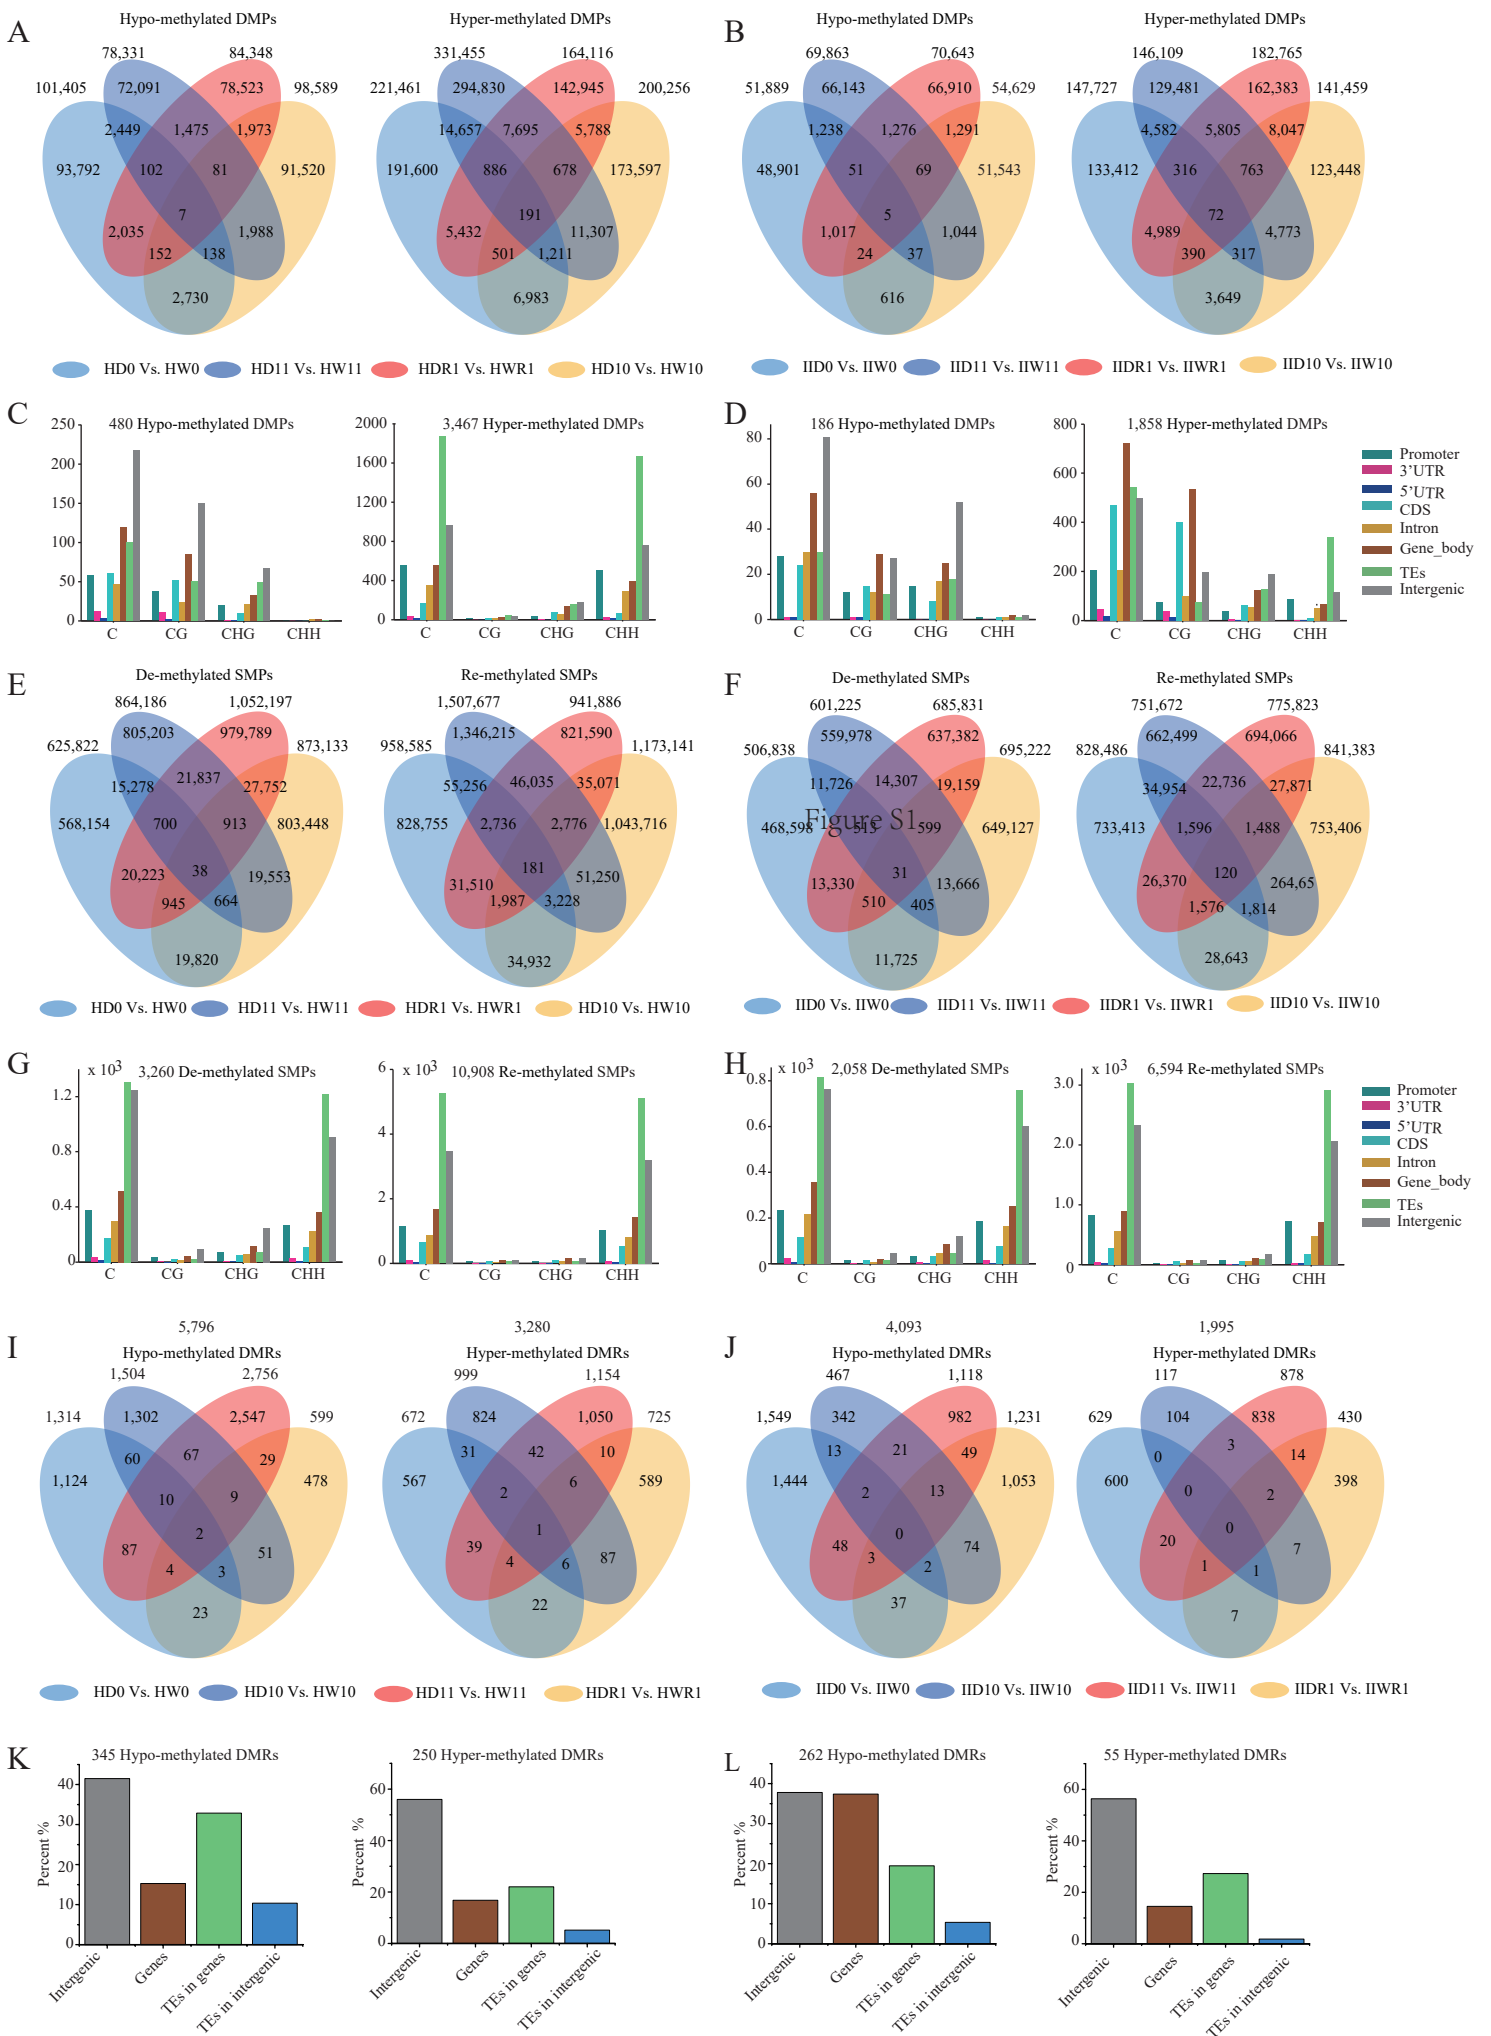



Figure S5

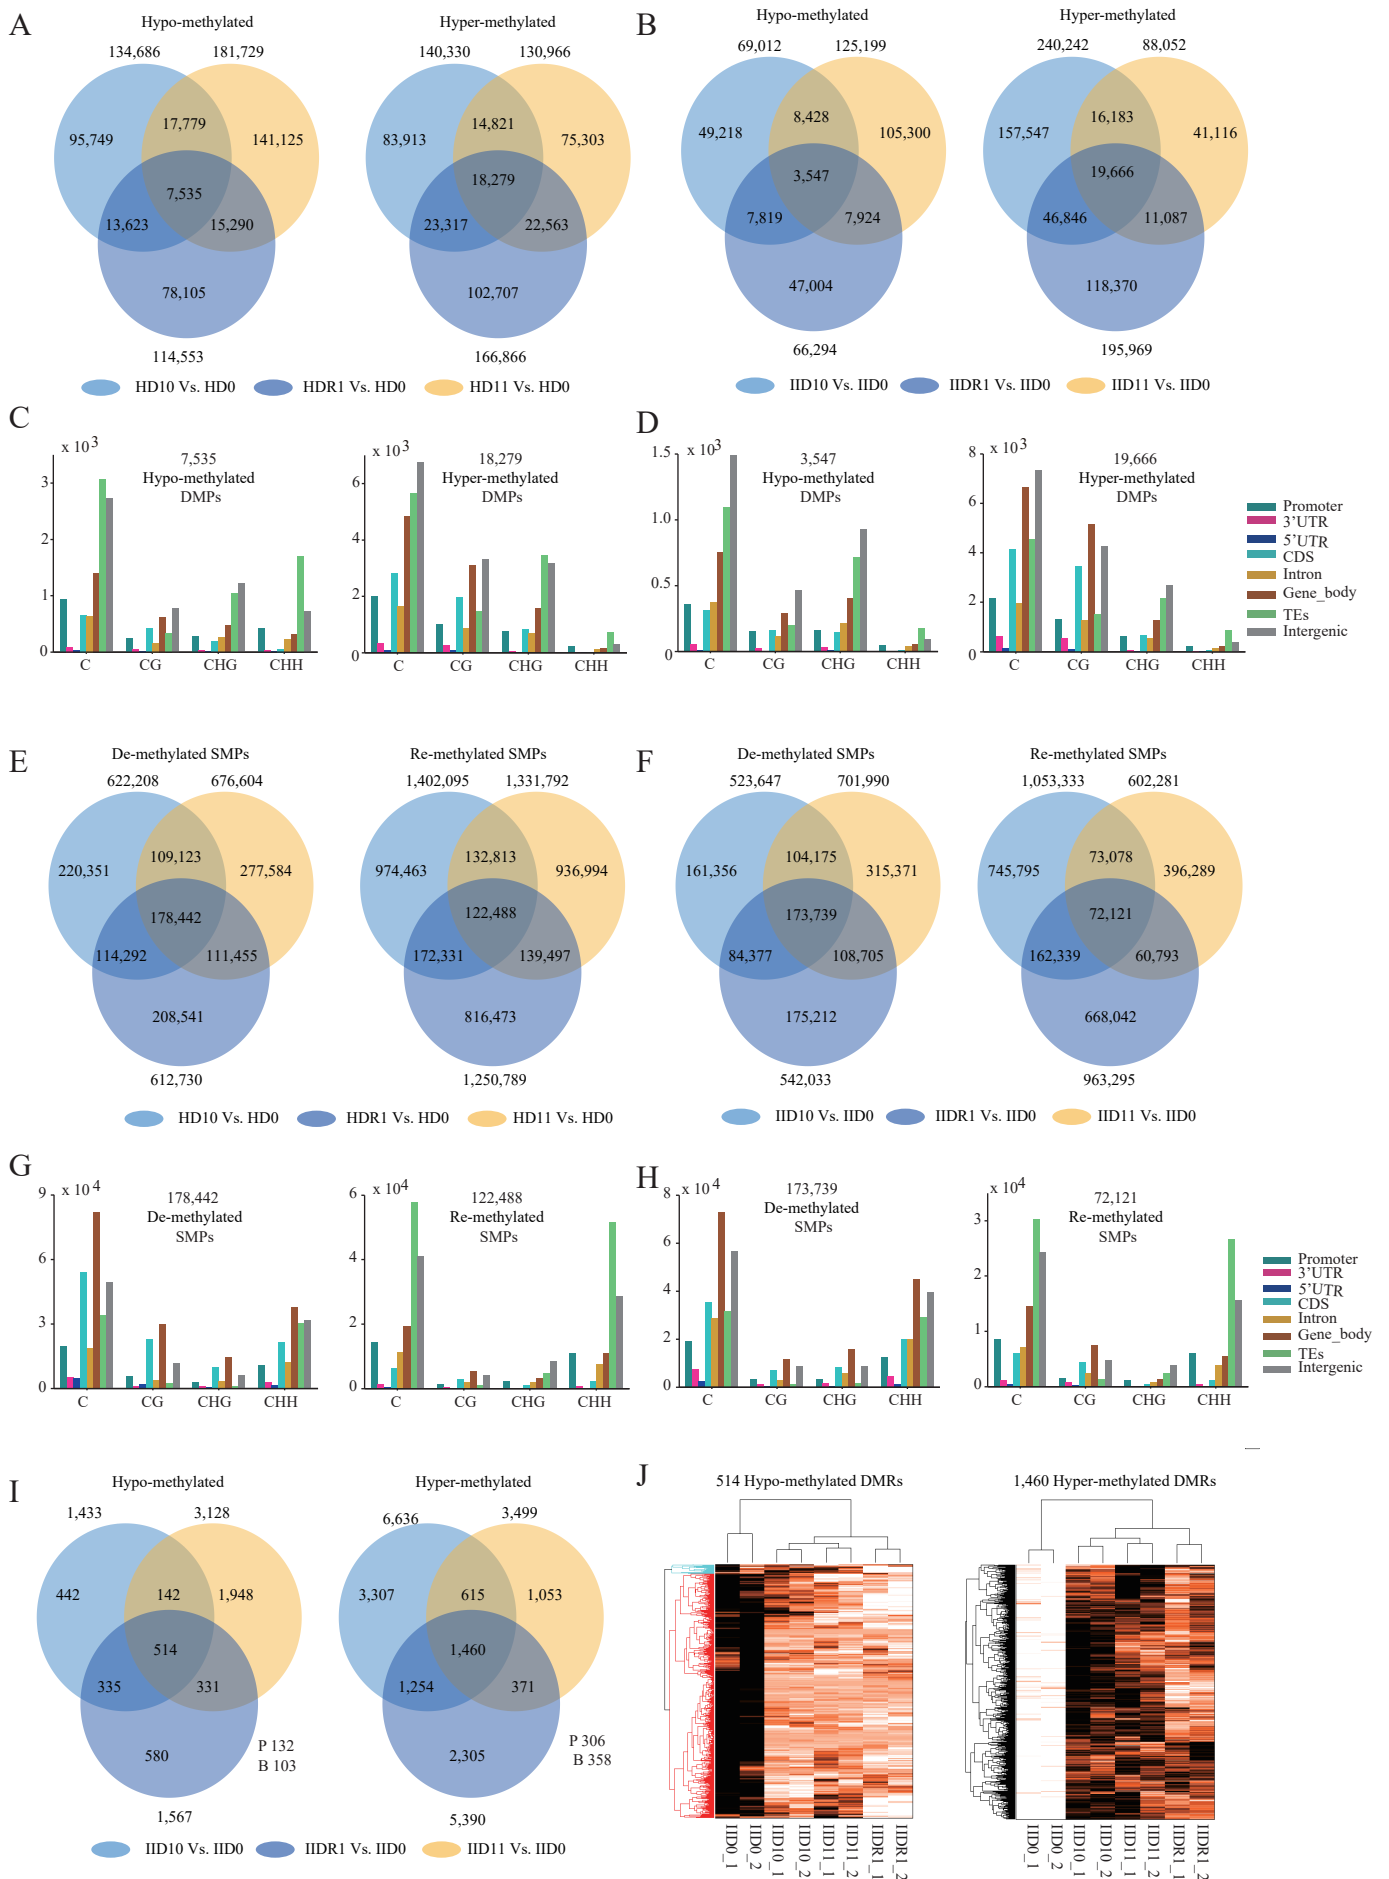

Figure S6

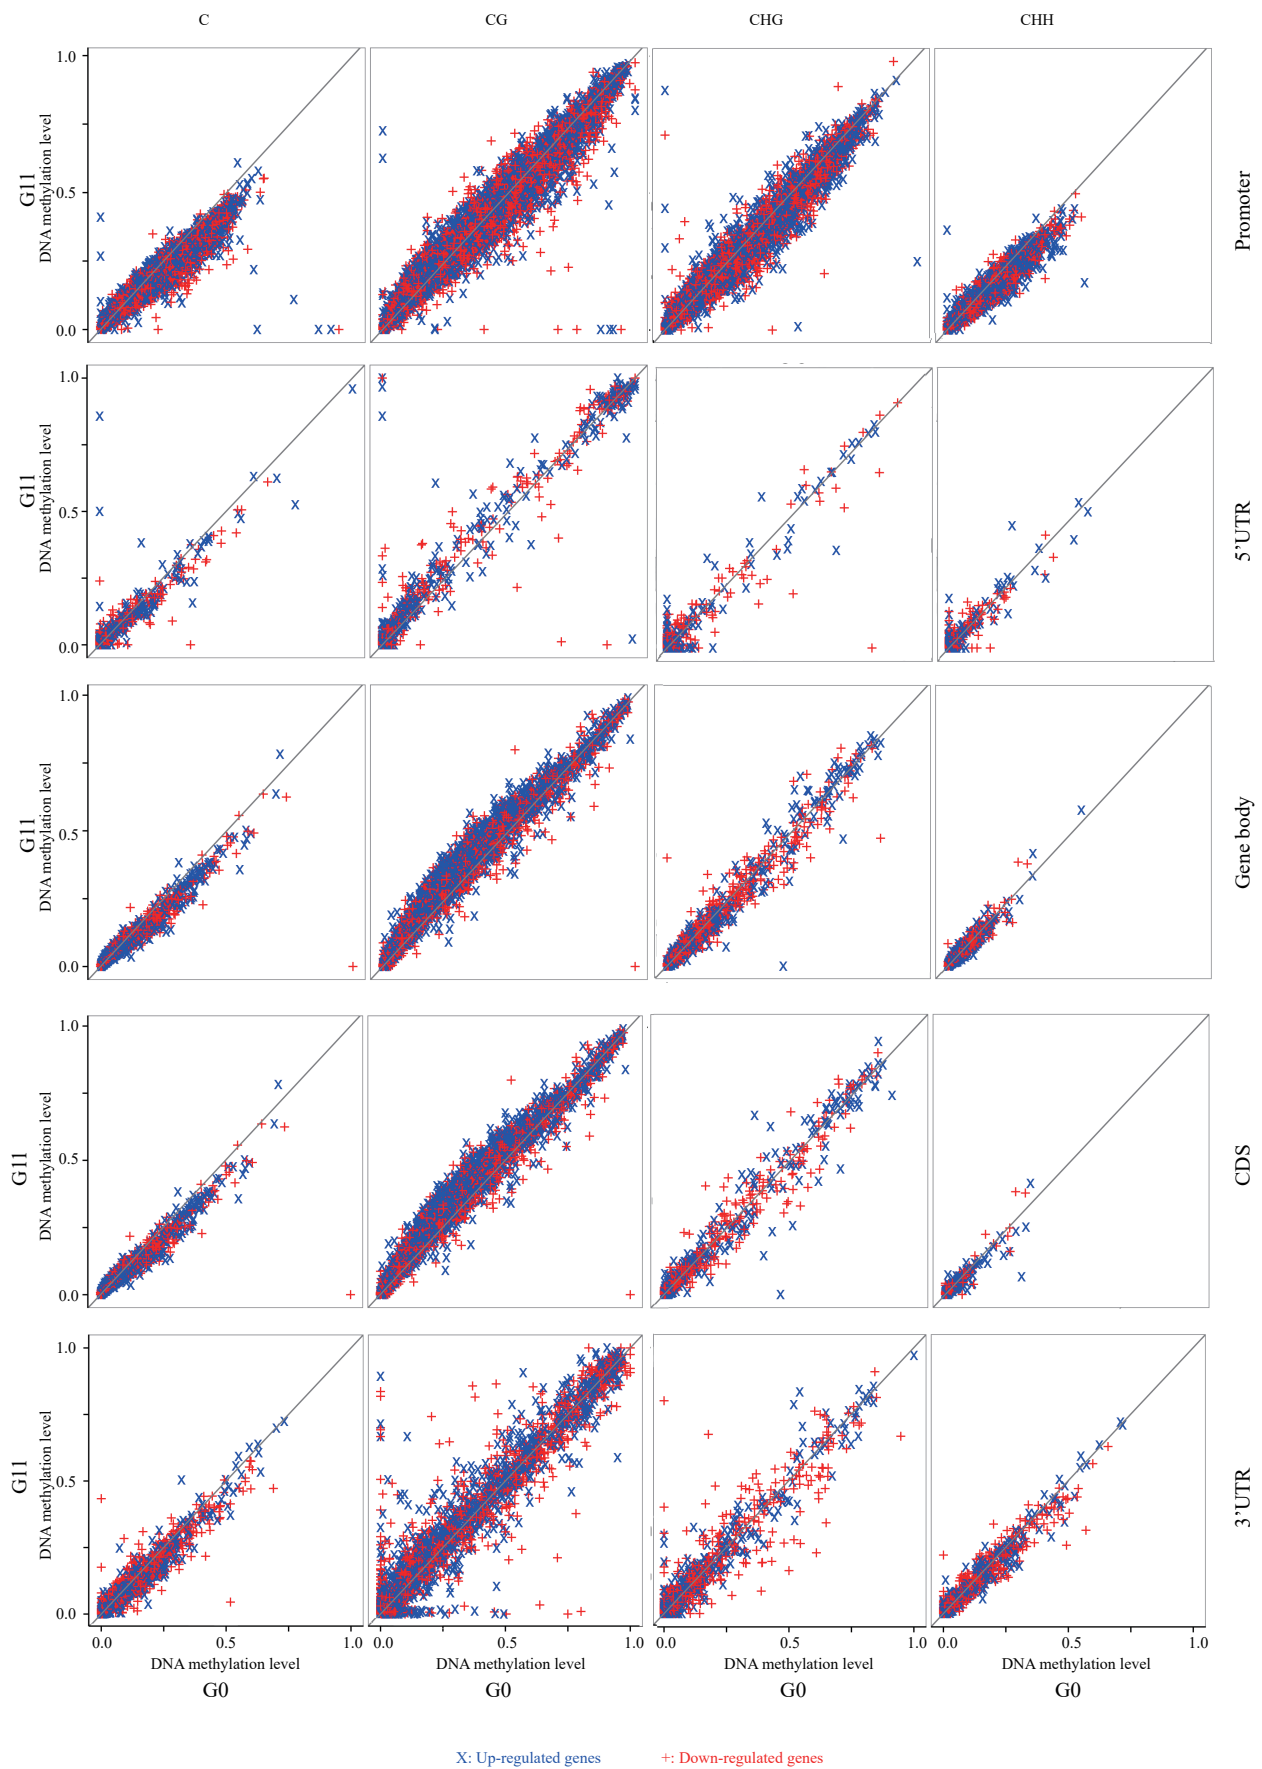

Figure S7

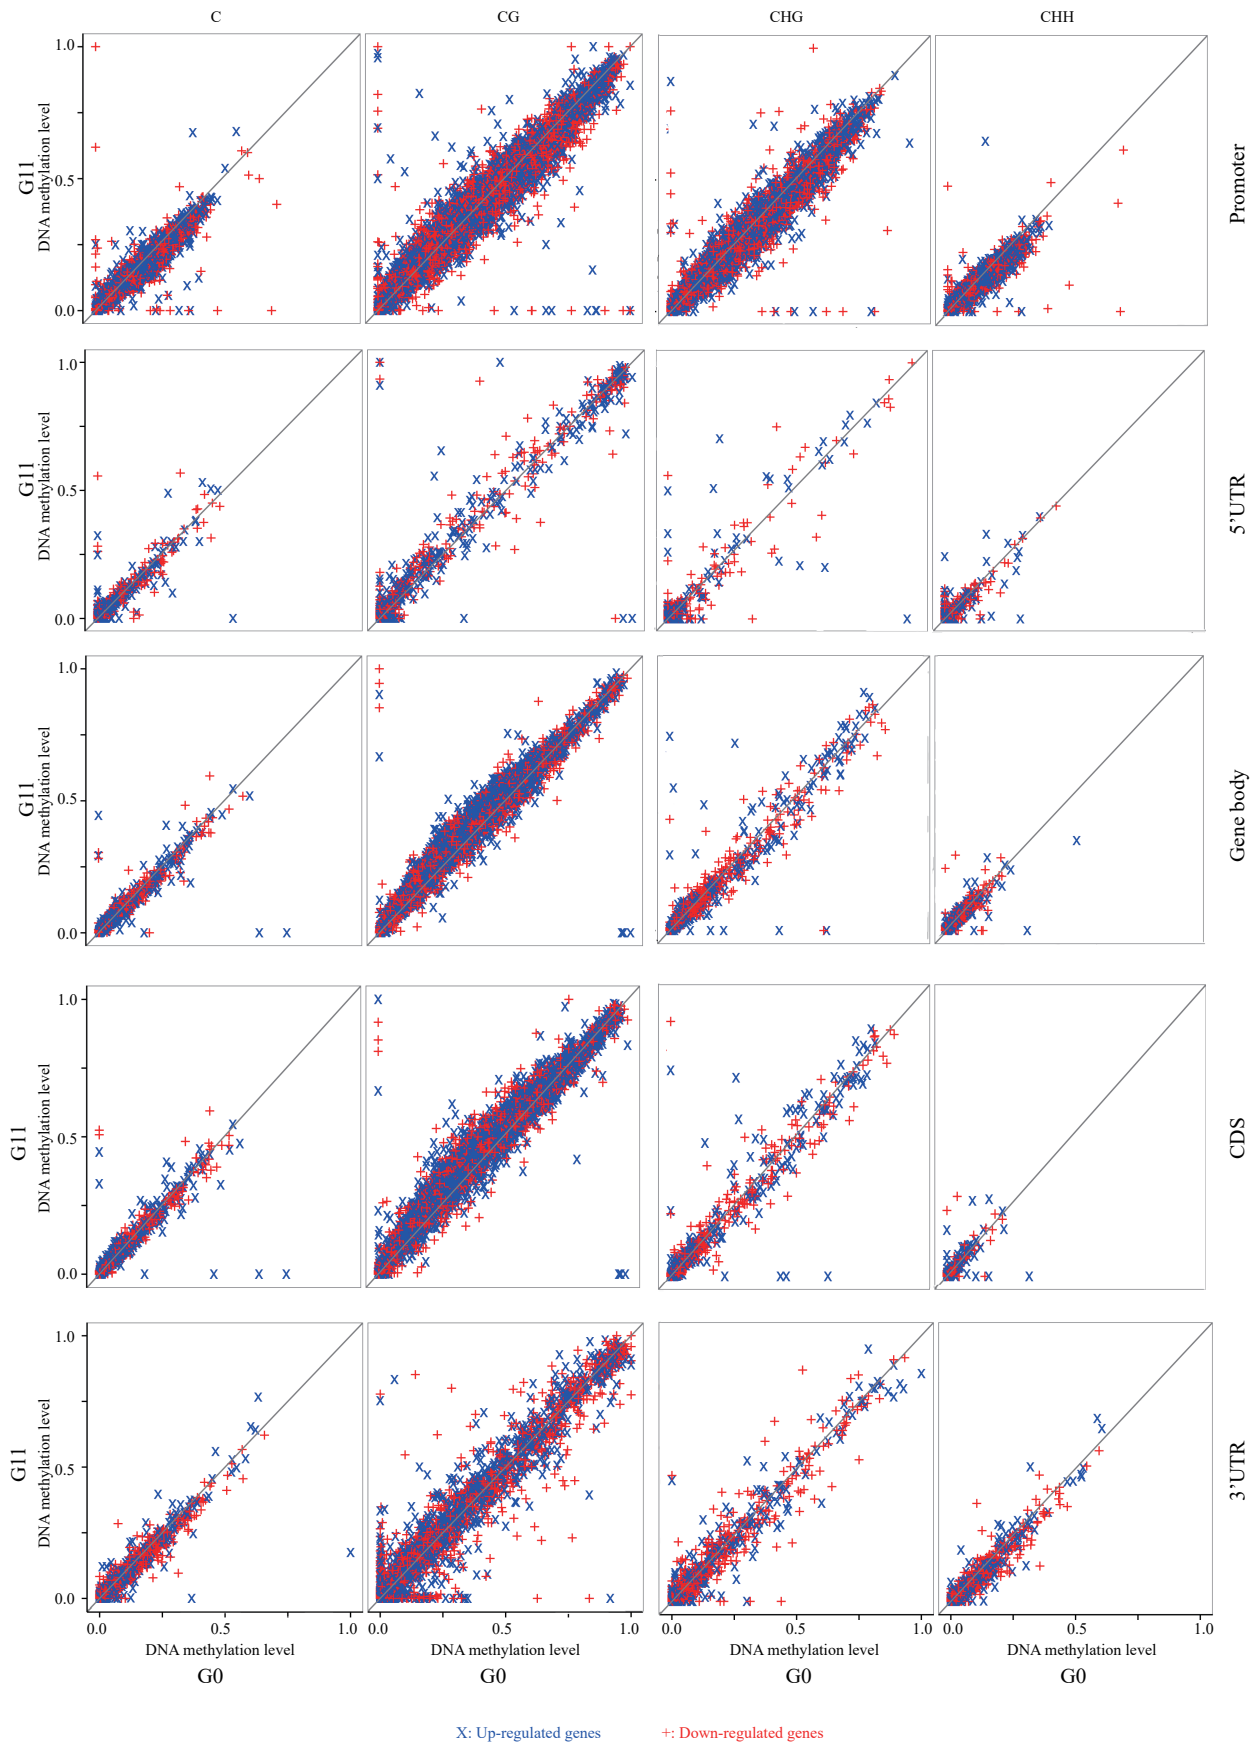

Figure S8

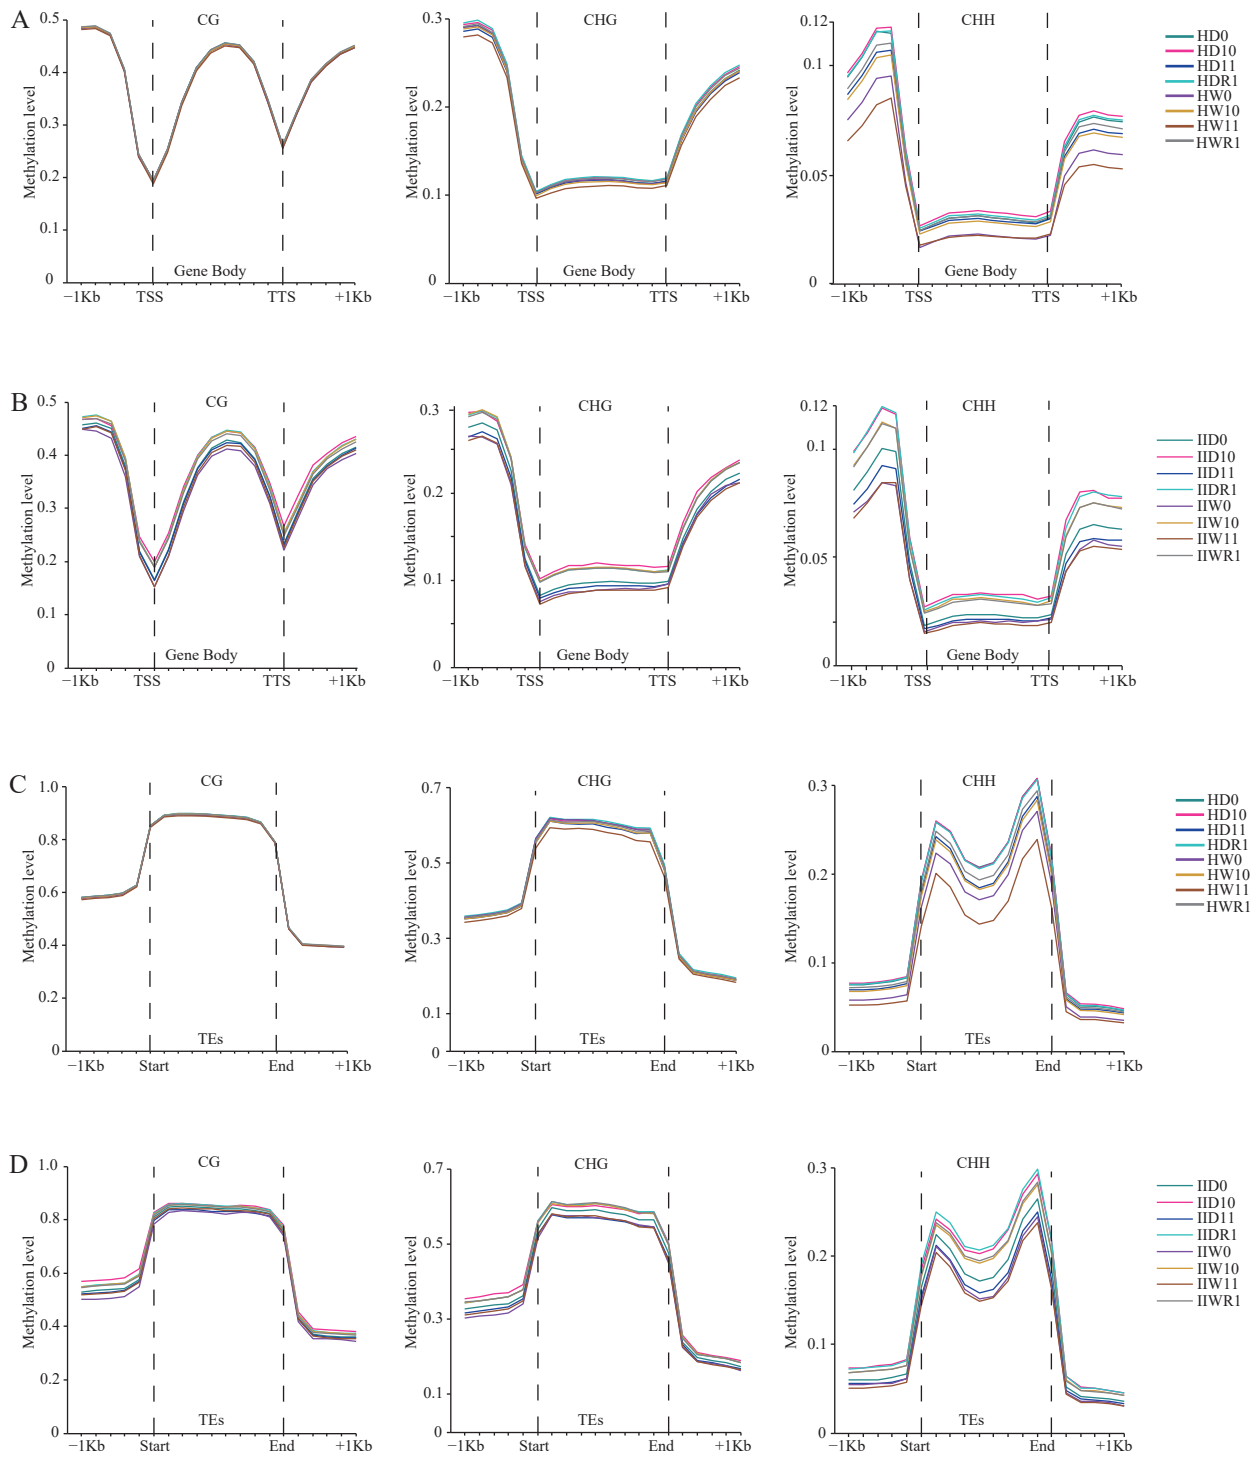

Figure S9

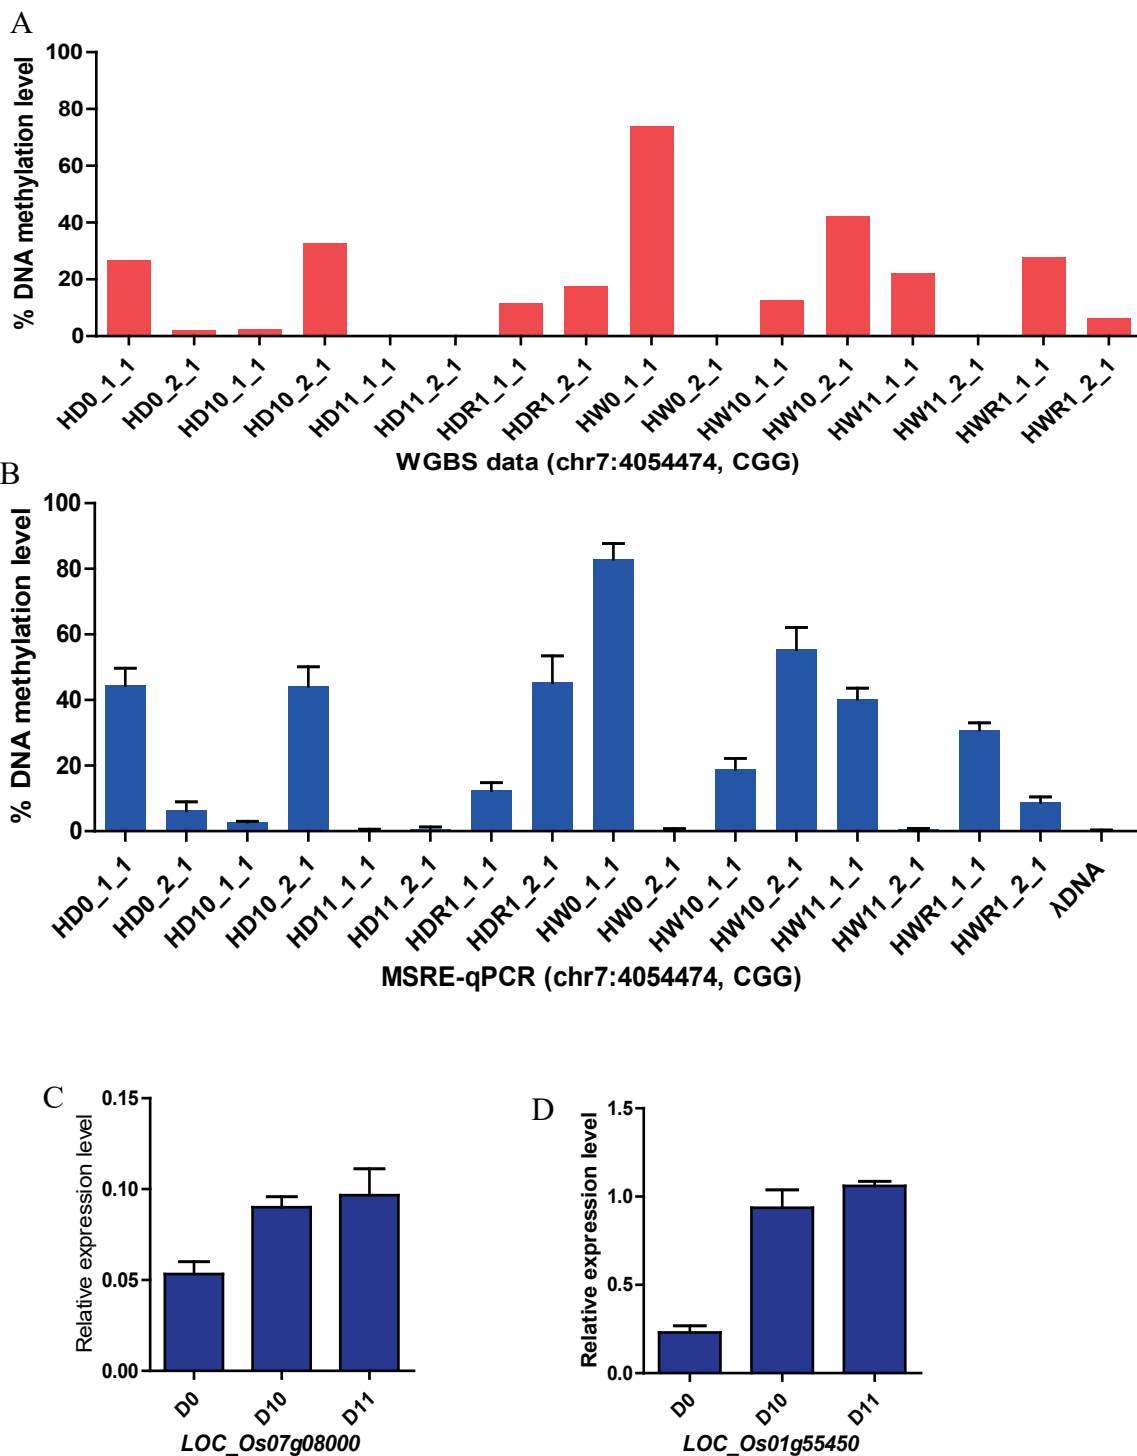

Figure S10

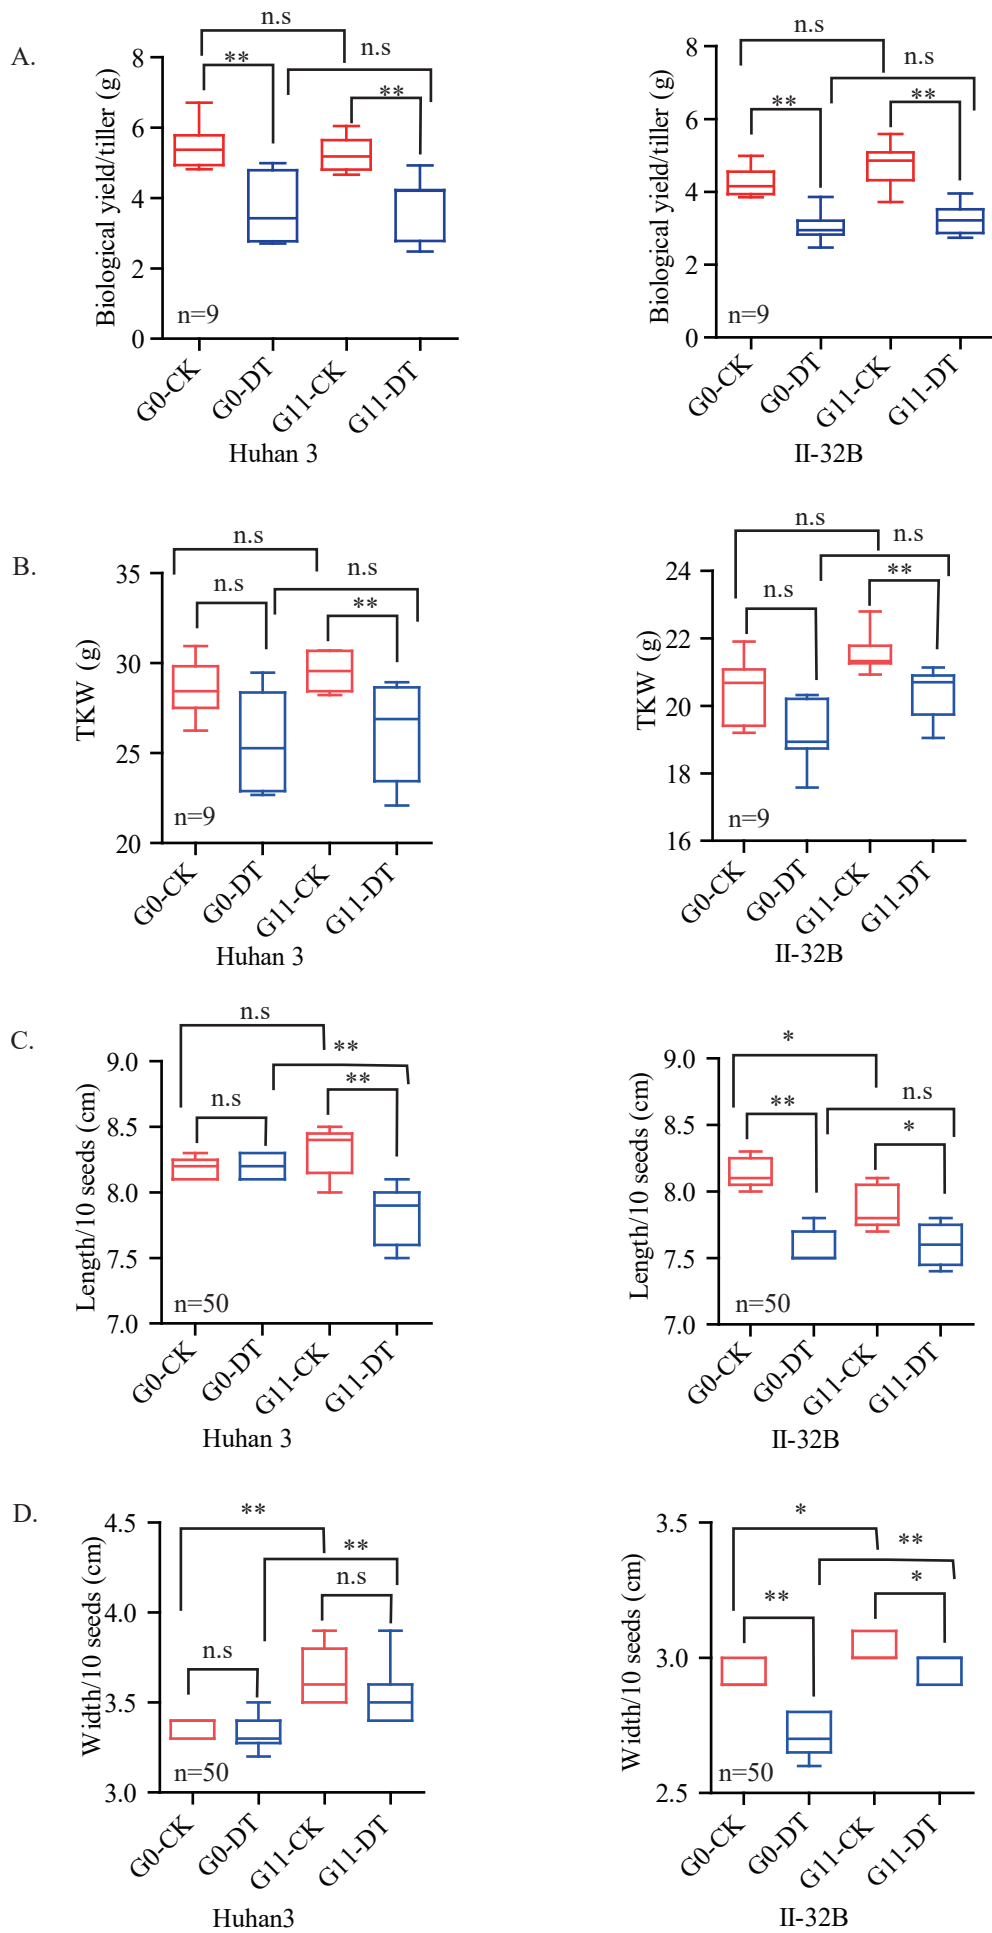

**Table S1 WGBS data set details**

| Varieties | Samples | Conversion rate | Total reads | Uniquely mapped reads | Genome coverage (×) | Strand_specific coverage (×) | Genome coverage (%) | C coverage $\geq 1$ |            |             |             | C coverage $\geq 3$ |            |             |             | mC in C coverage $\geq 3$ |            |             |             |
|-----------|---------|-----------------|-------------|-----------------------|---------------------|------------------------------|---------------------|---------------------|------------|-------------|-------------|---------------------|------------|-------------|-------------|---------------------------|------------|-------------|-------------|
|           |         |                 |             |                       |                     |                              |                     | all Cs              | CG context | CHG context | CHH context | all Cs              | CG context | CHG context | CHH context | all Cs                    | CG context | CHG context | CHH context |
| Huhan3    | HD0_1   | 99.77%          | 181,843,462 | 125,143,714           | 30.13               | 14.50                        | 82.78%              | 134,778,921         | 25,899,372 | 22,982,225  | 85,897,324  | 115,111,104         | 23,800,011 | 20,139,452  | 71,171,641  | 34,273,371                | 12,946,132 | 7,707,163   | 13,620,076  |
|           | HD0_2   | 99.66%          | 181,468,332 | 119,818,814           | 28.84               | 14.00                        | 83.11%              | 135,317,909         | 25,722,220 | 23,307,202  | 86,288,487  | 116,917,291         | 23,126,381 | 20,897,055  | 72,893,855  | 39,998,137                | 13,029,061 | 9,125,405   | 17,843,671  |
|           | HD10_1  | 99.67%          | 170,237,156 | 113,494,818           | 27.32               | 12.80                        | 85.24%              | 138,788,649         | 25,569,033 | 23,471,771  | 89,747,845  | 126,614,692         | 23,071,968 | 21,677,947  | 81,864,777  | 41,370,197                | 12,374,106 | 9,136,501   | 19,859,590  |
|           | HD10_2  | 99.50%          | 172,138,944 | 113,008,580           | 27.20               | 12.70                        | 85.71%              | 139,543,495         | 25,855,466 | 23,640,339  | 90,047,690  | 127,923,774         | 23,595,091 | 21,973,035  | 82,355,648  | 44,859,744                | 13,119,581 | 9,819,964   | 21,920,199  |
|           | HD11_1  | 99.45%          | 181,404,200 | 122,665,634           | 29.53               | 13.30                        | 85.71%              | 139,553,484         | 25,472,271 | 23,477,866  | 90,603,347  | 129,153,505         | 22,883,734 | 21,770,629  | 84,499,142  | 43,354,914                | 12,268,546 | 9,445,286   | 21,641,082  |
|           | HD11_2  | 99.64%          | 179,632,364 | 124,114,058           | 29.88               | 14.30                        | 84.52%              | 137,609,429         | 25,779,960 | 23,490,412  | 88,339,057  | 122,009,730         | 23,278,838 | 21,402,092  | 77,328,800  | 40,738,165                | 12,994,102 | 9,237,930   | 18,506,133  |
|           | HDR1_1  | 99.71%          | 168,650,868 | 113,943,064           | 27.43               | 12.80                        | 84.93%              | 138,288,631         | 25,449,417 | 23,419,072  | 89,420,142  | 125,248,874         | 22,898,996 | 21,541,077  | 80,808,801  | 39,855,075                | 12,134,554 | 8,920,872   | 18,799,649  |
|           | HDR1_2  | 99.62%          | 173,428,974 | 113,237,684           | 27.26               | 12.80                        | 84.89%              | 138,208,809         | 25,679,505 | 23,510,180  | 89,019,124  | 123,811,778         | 23,200,280 | 21,538,810  | 79,072,688  | 42,235,255                | 12,761,812 | 9,395,241   | 20,078,202  |
|           | HW0_1   | 99.82%          | 181,572,724 | 124,068,854           | 29.87               | 14.20                        | 82.75%              | 134,736,133         | 25,334,517 | 23,108,498  | 86,293,118  | 117,189,580         | 22,570,982 | 20,773,590  | 73,845,008  | 33,164,132                | 11,862,437 | 8,316,399   | 12,985,296  |
|           | HW0_2   | 99.82%          | 180,682,974 | 121,180,814           | 29.17               | 13.60                        | 82.96%              | 135,080,424         | 25,315,094 | 23,101,029  | 86,664,301  | 119,184,083         | 22,766,117 | 20,973,695  | 75,444,271  | 34,992,436                | 11,942,820 | 8,255,356   | 14,794,260  |
|           | HW10_1  | 99.67%          | 171,885,916 | 114,115,948           | 27.47               | 12.70                        | 85.28%              | 138,858,347         | 25,530,503 | 23,494,811  | 89,833,033  | 126,974,540         | 23,088,243 | 21,749,555  | 82,136,742  | 39,837,387                | 12,344,640 | 9,053,453   | 18,439,294  |
|           | HW10_2  | 99.62%          | 172,890,296 | 118,430,730           | 28.51               | 13.20                        | 85.41%              | 139,068,088         | 25,574,443 | 23,500,871  | 89,992,774  | 127,846,154         | 23,210,920 | 21,841,251  | 82,793,983  | 41,496,929                | 12,485,486 | 9,244,921   | 19,766,522  |
|           | HW11_1  | 99.52%          | 181,721,480 | 122,517,846           | 29.49               | 13.40                        | 85.93%              | 139,916,463         | 25,688,171 | 23,591,987  | 90,636,305  | 129,508,439         | 23,237,654 | 21,948,067  | 84,322,718  | 41,090,608                | 12,586,808 | 9,514,964   | 18,988,836  |
|           | HW11_2  | 99.60%          | 188,305,712 | 133,031,848           | 32.02               | 14.20                        | 84.68%              | 137,881,707         | 24,809,467 | 23,081,118  | 89,991,122  | 126,674,229         | 21,791,232 | 21,118,272  | 83,764,725  | 37,033,178                | 10,921,689 | 8,436,745   | 17,674,744  |
|           | HWR1_1  | 99.63%          | 172,559,304 | 120,799,374           | 29.08               | 13.50                        | 85.38%              | 139,010,122         | 25,540,229 | 23,485,490  | 89,984,403  | 127,795,790         | 23,143,137 | 21,814,259  | 82,838,394  | 41,143,682                | 12,427,818 | 9,186,111   | 19,529,753  |
| HWR1_2    | 99.57%  | 172,407,024     | 116,059,152 | 27.94                 | 13.20               | 85.00%                       | 138,400,891         | 25,695,306          | 23,507,118 | 89,198,467  | 124,674,764 | 23,243,049          | 21,612,012 | 79,819,703  | 43,276,262  | 12,845,440                | 9,565,955  | 20,864,867  |             |
| Average   | 99.64%  | 176,926,858     | 119,726,933 | 28.82                 | 13.45               | 84.64%                       | 137,815,094         | 25,557,186          | 23,385,624 | 88,872,284  | 124,164,895 | 23,056,665          | 21,423,175 | 79,685,056  | 39,919,967  | 12,440,315                | 9,022,642  | 18,457,011  |             |
| II-32B    | IID0_1  | 99.81%          | 179,208,446 | 105,882,346           | 25.49               | 11.80                        | 76.53%              | 124,606,752         | 22,505,691 | 21,139,157  | 80,961,904  | 109,445,346         | 19,539,635 | 18,877,570  | 71,028,141  | 17,841,104                | 8,470,598  | 4,887,965   | 4,482,541   |
|           | IID0_2  | 99.69%          | 180,575,660 | 110,123,640           | 26.51               | 11.74                        | 74.94%              | 122,009,797         | 21,193,500 | 20,426,655  | 80,389,642  | 108,786,140         | 18,142,948 | 18,259,556  | 72,383,636  | 15,564,298                | 7,179,025  | 4,214,566   | 4,170,707   |
|           | IID10_1 | 99.62%          | 169,465,964 | 92,320,586            | 22.22               | 10.50                        | 77.16%              | 125,636,593         | 23,277,277 | 21,514,826  | 80,844,490  | 107,736,917         | 20,247,067 | 18,968,368  | 68,521,482  | 20,876,730                | 9,444,766  | 5,496,374   | 5,935,590   |
|           | IID10_2 | 99.64%          | 172,976,524 | 97,642,944            | 23.51               | 10.90                        | 78.07%              | 127,104,856         | 23,215,330 | 21,577,980  | 82,311,546  | 113,591,799         | 20,516,542 | 19,540,814  | 73,534,443  | 20,416,049                | 9,379,039  | 5,464,726   | 5,572,284   |
|           | IID11_1 | 99.76%          | 182,207,216 | 107,955,586           | 25.99               | 11.51                        | 75.78%              | 123,386,051         | 21,711,165 | 20,683,463  | 80,991,423  | 110,412,607         | 18,606,111 | 18,508,751  | 73,297,745  | 15,713,605                | 7,425,237  | 4,173,869   | 4,114,499   |
|           | IID11_2 | 99.77%          | 181,985,458 | 111,351,458           | 26.81               | 11.95                        | 76.09%              | 123,895,989         | 21,810,806 | 20,810,387  | 81,274,796  | 111,292,666         | 18,948,666 | 18,769,114  | 73,574,886  | 16,788,116                | 7,934,134  | 4,655,830   | 4,198,152   |
|           | IIDR1_1 | 99.61%          | 172,691,624 | 95,014,666            | 22.87               | 10.82                        | 77.03%              | 125,412,951         | 23,270,446 | 21,471,535  | 80,670,970  | 108,402,621         | 20,415,788 | 19,075,047  | 68,911,786  | 20,939,962                | 9,550,942  | 5,548,945   | 5,840,075   |
|           | IIDR1_2 | 99.67%          | 168,906,748 | 97,082,758            | 23.37               | 10.68                        | 77.09%              | 125,509,909         | 22,733,330 | 21,291,960  | 81,484,619  | 110,987,576         | 19,796,498 | 19,095,434  | 72,095,644  | 18,892,254                | 8,809,127  | 5,087,296   | 4,995,831   |
|           | IIW0_1  | 99.77%          | 174,162,830 | 98,559,862            | 23.73               | 10.65                        | 75.72%              | 123,284,376         | 21,753,883 | 20,702,762  | 80,827,731  | 109,820,871         | 18,639,055 | 18,487,462  | 72,694,354  | 15,020,086                | 7,394,301  | 4,168,991   | 3,456,794   |
|           | IIW0_2  | 99.67%          | 179,175,868 | 101,958,348           | 24.54               | 10.99                        | 75.25%              | 122,521,345         | 21,456,060 | 20,545,049  | 80,520,236  | 109,237,853         | 18,340,989 | 18,364,934  | 72,531,930  | 15,005,787                | 7,331,058  | 4,147,947   | 3,526,782   |
|           | IIW10_1 | 99.67%          | 172,150,684 | 94,517,288            | 22.75               | 10.65                        | 76.32%              | 124,265,188         | 23,133,611 | 21,355,621  | 79,775,956  | 106,058,129         | 20,132,600 | 18,806,685  | 67,118,844  | 20,037,173                | 9,378,915  | 5,409,560   | 5,248,698   |
|           | IIW10_2 | 99.59%          | 171,356,848 | 100,206,278           | 24.12               | 11.22                        | 77.76%              | 126,614,283         | 23,118,247 | 21,481,104  | 82,014,932  | 113,139,576         | 20,399,930 | 19,447,415  | 73,292,231  | 19,520,340                | 9,206,569  | 5,293,457   | 5,020,314   |
|           | IIW11_1 | 99.76%          | 181,109,402 | 110,061,804           | 26.49               | 11.92                        | 74.35%              | 121,055,079         | 20,998,835 | 20,268,403  | 79,787,841  | 107,194,766         | 17,892,937 | 18,028,734  | 71,273,095  | 13,736,136                | 6,800,755  | 3,832,241   | 3,103,140   |
|           | IIW11_2 | 99.69%          | 180,466,108 | 110,114,766           | 26.51               | 11.89                        | 75.34%              | 122,670,475         | 21,408,548 | 20,548,784  | 80,713,143  | 109,081,449         | 18,250,866 | 18,315,750  | 72,514,833  | 15,021,261                | 7,211,970  | 4,095,376   | 3,713,915   |
|           | IWR1_1  | 99.66%          | 173,564,342 | 99,746,186            | 24.01               | 11.15                        | 77.67%              | 126,467,312         | 23,175,612 | 21,509,377  | 81,782,323  | 112,089,036         | 20,432,617 | 19,396,654  | 72,259,765  | 19,428,749                | 9,250,103  | 5,308,347   | 4,870,299   |
| IWR1_2    | 99.66%  | 173,772,026     | 98,526,050  | 23.72                 | 11.06               | 77.68%                       | 126,482,560         | 23,228,177          | 21,521,367 | 81,733,016  | 112,391,564 | 20,581,770          | 19,459,748 | 72,350,046  | 20,437,269  | 9,375,422                 | 5,466,639  | 5,595,208   |             |
| Average   | 99.69%  | 175,860,984     | 101,941,535 | 24.54                 | 11.21               | 76.42%                       | 124,432,720         | 22,374,407          | 21,053,027 | 81,005,286  | 109,979,307 | 19,430,251          | 18,837,627 | 71,711,429  | 17,827,432  | 8,383,873                 | 4,828,258  | 4,615,302   |             |

Reference genome:

Nipponbare

all Cs: 162,817,618

CG context: 30,862,860

CHG context: 27,417,182

**Table S2 The numbers of DMPs, SMPs and DMRs between treated and untreated plants and between generations.**

| Combinations    | C-DMPs  | CG-DMPs | CHG-DMPs | CHH-DMPs | C-SMPs    | CG-SMPs | CHG-SMPs | CHH-SMPs  | DMRs   | Hyper-DMRs | Hypo-DMRs |
|-----------------|---------|---------|----------|----------|-----------|---------|----------|-----------|--------|------------|-----------|
| <b>Huhan3</b>   |         |         |          |          |           |         |          |           |        |            |           |
| HD10-HD0        | 275,016 | 81,283  | 115,361  | 78,372   | 2,024,303 | 198,242 | 246,043  | 1,580,018 | 3,489  | 1,708      | 1,781     |
| HD11-HD0        | 312,695 | 92,477  | 127,987  | 92,231   | 2,008,396 | 225,427 | 252,101  | 1,530,868 | 5,367  | 1,991      | 3,376     |
| HD11-HD10       | 275,374 | 78,596  | 120,523  | 76,255   | 2,202,100 | 201,124 | 279,361  | 1,721,615 | 4,611  | 1,584      | 3,027     |
| HD0-HW0         | 322,866 | 73,951  | 112,246  | 136,669  | 1,584,407 | 152,184 | 175,084  | 1,257,139 | 1,986  | 672        | 1,314     |
| HD10-HW10       | 298,845 | 65,887  | 113,195  | 119,763  | 2,046,274 | 157,018 | 245,769  | 1,643,487 | 2,503  | 999        | 1,504     |
| HD11-HW11       | 409,786 | 68,092  | 108,789  | 232,905  | 2,371,863 | 174,394 | 288,793  | 1,908,676 | 3,910  | 1,154      | 2,756     |
| HD10R1-HW10R1   | 248,464 | 56,733  | 98,091   | 93,640   | 1,994,083 | 154,097 | 236,645  | 1,603,341 | 1,324  | 725        | 599       |
| HW10-HW0        | 293,682 | 83,349  | 128,254  | 82,079   | 1,887,194 | 156,440 | 211,855  | 1,518,899 | 4,078  | 2,199      | 1,879     |
| HW11-HW0        | 338,144 | 80,269  | 120,214  | 137,661  | 2,074,259 | 169,124 | 265,173  | 1,639,962 | 6,926  | 2,427      | 4,499     |
| HW11-HW10       | 396,872 | 77,897  | 114,000  | 204,975  | 2,288,495 | 151,785 | 265,335  | 1,871,375 | 5,564  | 1,286      | 4,278     |
| HD10R1-HD0      | 281,419 | 84,683  | 122,595  | 74,141   | 1,863,519 | 192,742 | 214,043  | 1,456,734 | 4,099  | 2,155      | 1,944     |
| HD10R1-HD10     | 260,539 | 68,637  | 119,423  | 72,479   | 1,999,616 | 164,875 | 240,107  | 1,594,634 | 2,938  | 1,655      | 1,283     |
| HW10R1-HW0      | 302,439 | 81,100  | 125,408  | 95,931   | 2,096,919 | 178,751 | 242,314  | 1,675,854 | 4,304  | 2,781      | 1,523     |
| HW10R1-HW10     | 237,906 | 61,542  | 107,663  | 68,701   | 2,035,334 | 162,881 | 245,639  | 1,626,814 | 2,311  | 1,540      | 771       |
| <b>II-32B</b>   |         |         |          |          |           |         |          |           |        |            |           |
| IID10-IID0      | 309,254 | 89,171  | 105,823  | 114,260  | 1,576,980 | 150,887 | 195,081  | 1,231,012 | 8,060  | 6,626      | 1,433     |
| IID11-IID0      | 213,251 | 71,145  | 86,271   | 55,835   | 1,304,271 | 113,151 | 163,446  | 1,027,674 | 6,624  | 3,496      | 3,127     |
| IID11-IID10     | 380,567 | 72,111  | 102,073  | 206,383  | 1,700,870 | 119,805 | 198,623  | 1,382,442 | 10,395 | 786        | 9,608     |
| IID0-IIW0       | 199,616 | 58,075  | 72,054   | 69,487   | 1,335,324 | 85,853  | 166,043  | 1,083,428 | 2,179  | 629        | 1,549     |
| IID10-IIW10     | 196,088 | 47,780  | 69,448   | 78,860   | 1,536,605 | 115,474 | 194,345  | 1,226,786 | 585    | 117        | 467       |
| IID11-IIW11     | 215,972 | 80,277  | 75,212   | 60,483   | 1,352,897 | 83,186  | 175,008  | 1,094,703 | 1,997  | 878        | 1,118     |
| IID10R1-IIW10R1 | 253,408 | 92,532  | 88,311   | 72,565   | 1,461,654 | 112,590 | 184,713  | 1,164,351 | 1,662  | 430        | 1,231     |
| IIW10-IIW0      | 345,454 | 87,140  | 105,524  | 152,790  | 1,817,883 | 158,636 | 223,421  | 1,435,826 | 11,193 | 9,690      | 1,502     |
| IIW11-IIW0      | 170,742 | 62,407  | 75,130   | 33,205   | 1,373,081 | 116,621 | 189,489  | 1,066,971 | 6,193  | 3,632      | 2,560     |
| IIW11-IIW10     | 313,180 | 69,639  | 96,680   | 146,861  | 1,856,569 | 135,911 | 230,942  | 1,489,716 | 8,524  | 971        | 7,552     |
| IID10R1_IID0    | 262,263 | 77,199  | 89,434   | 95,630   | 1,505,328 | 141,469 | 188,236  | 1,175,623 | 6,958  | 5,390      | 1,567     |
| IID10R1_IID10   | 197,811 | 55,838  | 89,181   | 52,792   | 1,531,962 | 139,049 | 197,635  | 1,195,278 | 2,187  | 858        | 1,328     |
| IIW10R1_IIW0    | 338,570 | 78,657  | 99,510   | 160,403  | 1,713,237 | 136,018 | 205,133  | 1,372,086 | 10,326 | 8,532      | 1,793     |
| IIW10R1_IIW10   | 194,938 | 57,843  | 87,555   | 49,540   | 1,505,185 | 132,014 | 195,164  | 1,178,007 | 2,459  | 839        | 1,619     |



**Table S3. Amount of non-TE genes which related to epimutations whose recurrent frequencies  $\geq 3$  involved in seven GOSlim terms.**

| GOSlim Accessions/Terms                              | a      | b      | c      | d      | e      | f      | g      | h      |
|------------------------------------------------------|--------|--------|--------|--------|--------|--------|--------|--------|
| Epimutations with recurrent frequencies $\geq 3$     | 480    | 3,467  | 186    | 1,858  | 3,260  | 10,908 | 2,058  | 6,594  |
| GO:0009991/response to extracellular stimulus        | 5      | 1      | 1      | 2      | 7      | 6      | 2      | 6      |
| GO:0009719/response to endogenous stimulus           | 5      | 11     | 1      | 30     | 19     | 59     | 11     | 25     |
| GO:0009628/response to abiotic stimulus              | 9      | 21     | 5      | 30     | 31     | 76     | 18     | 48     |
| GO:0009607/response to biotic stimulus               | 3      | 14     | 2      | 11     | 16     | 49     | 8      | 29     |
| GO:0009605/response to external stimulus             | 0      | 2      | 0      | 4      | 2      | 10     | 0      | 3      |
| GO:0006950/response to stress                        | 14     | 38     | 7      | 49     | 57     | 125    | 33     | 79     |
| GO:0040029/regulation of gene expression, epigenetic | 1      | 1      | 1      | 3      | 7      | 6      | 1      | 8      |
| Total (each gene was counted only once)              | 19     | 59     | 9      | 84     | 83     | 208    | 53     | 121    |
| Total genes related to these epimutations            | 99     | 407    | 48     | 553    | 498    | 1,481  | 346    | 823    |
| Proportions                                          | 19.19% | 14.50% | 18.75% | 15.19% | 16.67% | 14.04% | 15.32% | 14.70% |

Amount of genes related to hypo-methylated DMPs (a) and hyper-methylated DMPs (b) in Huhan3

Amount of genes related to hypo-methylated DMPs (c) and hyper-methylated DMPs (d) in II-32B

Amount of genes related to de-methylated SMPs (e) and re-methylated SMPs (f) in Huhan3

Amount of genes related to de-methylated SMPs (g) and re-methylated SMPs (h) in II-32B.

**Table S4. Amount of non-TE genes that were related to transgenerational accumulated epimutations involved in seven GOSlim terms.**

| GOSlim Accessions/Terms                                | a      | b      | c      | d      | e       | f       | g       | h      |
|--------------------------------------------------------|--------|--------|--------|--------|---------|---------|---------|--------|
| Transgenerational accumulated epimutations             | 7,535  | 18,279 | 3,547  | 19,666 | 178,442 | 122,488 | 173,739 | 72,121 |
| GO:0009991/response to extracellular stimulus          | 0      | 2      | 1      | 6      | 8       | 2       | 6       | 1      |
| GO:0009719/response to endogenous stimulus             | 3      | 12     | 1      | 13     | 20      | 6       | 35      | 4      |
| GO:0009628/response to abiotic stimulus                | 4      | 22     | 2      | 30     | 45      | 5       | 40      | 6      |
| GO:0009607/response to biotic stimulus                 | 1      | 15     | 2      | 16     | 25      | 4       | 29      | 2      |
| GO:0009605/response to external stimulus               | 0      | 2      | 0      | 2      | 8       | 0       | 3       | 0      |
| GO:0006950/response to stress                          | 8      | 52     | 5      | 67     | 64      | 20      | 65      | 10     |
| GO:0040029/regulation of gene expression, epigenetic   | 0      | 1      | 0      | 4      | 2       | 1       | 15      | 1      |
| Total (each gene was counted only once)                | 11     | 66     | 7      | 90     | 90      | 27      | 119     | 13     |
| Total genes related to transgenerational epimutations* | 61     | 377    | 45     | 589    | 434     | 102     | 571     | 62     |
| Proportions                                            | 18.03% | 17.51% | 15.56% | 15.28% | 20.74%  | 26.47%  | 20.84%  | 20.97% |

Amount of genes related to hypo-methylated DMPs (a) and hyper-methylated DMPs (b) in Huhan3

Amount of genes related to hypo-methylated DMPs (c) and hyper-methylated DMPs (d) in II-32B

Amount of genes related to de-methylated SMPs (e) and re-methylated SMPs (f) in Huhan3

Amount of genes related to de-methylated SMPs (g) and re-methylated SMPs (h) in II-32B.

\*Non-TE genes that contained at least 3 transgenerational DMPs or at least 10 transgenerational SMPs

Table S5 Amount of functional genes that overlapped with drought-induced recurrent DMRs and transgenerational accumulated DMRs in Huhun3 and II-32B.

|                                              | Drought-induced recurrent DMRs <sup>1)</sup> |                         |                         |                         | Transgenerational accumulated DMRs |                        |                        |                        |
|----------------------------------------------|----------------------------------------------|-------------------------|-------------------------|-------------------------|------------------------------------|------------------------|------------------------|------------------------|
|                                              | Huhun3                                       |                         | II-32B                  |                         | Huhun3                             |                        | II-32B                 |                        |
|                                              | Hypo-methylated                              | Hyper-methylated        | Hypo-methylated         | Hyper-methylated        | Hypo-methylated                    | Hyper-methylated       | Hypo-methylated        | Hyper-methylated       |
| Total DMRs                                   | 345                                          | 250                     | 262                     | 55                      | 462                                | 515                    | 514                    | 1,460                  |
| DMRs that related to genes                   | 107                                          | 85                      | 105                     | 18                      | 162                                | 202                    | 180                    | 536                    |
| Percentages of these DMRs (%)                | 31.01                                        | 34                      | 40.08                   | 32.73                   | 35.06                              | 39.22                  | 35.02                  | 36.71                  |
| Genes (DMRs in promoter)                     | 66                                           | 54                      | 40                      | 12                      | 112                                | 114                    | 120                    | 294                    |
| Genes (DMRs in body)                         | 49                                           | 42                      | 78                      | 7                       | 77                                 | 137                    | 87                     | 325                    |
| Total genes <sup>2)</sup>                    | 110                                          | 89                      | 110                     | 19                      | 170                                | 217                    | 194                    | 572                    |
| Stress responsive genes <sup>3)</sup>        | 14                                           | 14                      | 21                      | 1                       | 18                                 | 26                     | 21                     | 44                     |
| Percentages of these genes (%)               | 12.73                                        | 15.73                   | 19.09                   | 5.26                    | 10.59                              | 11.98                  | 10.82                  | 7.69                   |
| References (figures and supplemental tables) | Figure S3A<br>Table S8A                      | Figure S3A<br>Table S8B | Figure S3B<br>Table S8C | Figure S3B<br>Table S8D | Figure 6A<br>Table S8E             | Figure 6A<br>Table S8F | Figure 6B<br>Table S8G | Figure 6B<br>Table S8H |

<sup>1)</sup> DMRs that recurrent frequencies  $\geq 2$  in comparisons between drought-treated and well-watered plants of four generations.

<sup>2)</sup> Some genes overlapped with DMRs in both their promoters and bodies, and each gene was counted only once.

<sup>3)</sup> Genes that directly participated in stress response pathways.

Table S6 mRNA-seq data set details

| Sample | Total_reads | Mapped_reads | Uniq_reads | Mapped_rate | Uniq_rate |
|--------|-------------|--------------|------------|-------------|-----------|
| HD0_1  | 36,901,082  | 33,016,422   | 26,397,060 | 0.8947      | 0.7153    |
| HD0_2  | 38,102,824  | 33,401,600   | 25,806,642 | 0.8766      | 0.6773    |
| HD10_1 | 36,971,644  | 33,295,268   | 26,581,604 | 0.9006      | 0.719     |
| HD10_2 | 38,632,108  | 33,649,300   | 27,953,416 | 0.871       | 0.7236    |
| HD11_1 | 39,507,974  | 34,934,156   | 27,868,168 | 0.8842      | 0.7054    |
| HD11_2 | 43,441,314  | 39,895,862   | 32,871,528 | 0.9184      | 0.7567    |
| HDR1_1 | 34,533,124  | 32,026,276   | 24,846,110 | 0.9274      | 0.7195    |
| HDR1_2 | 38,845,490  | 35,232,488   | 28,564,600 | 0.907       | 0.7353    |

**Table S7 Seven experimental array-combinations**

| Experiment                                  | Control1            | Control2            | Control3            | Treat1              | Treat2               | Treat3               | GSE             | Annotation                                                                                                                      |
|---------------------------------------------|---------------------|---------------------|---------------------|---------------------|----------------------|----------------------|-----------------|---------------------------------------------------------------------------------------------------------------------------------|
| Drought, Azucena leaf                       | GSM591761           | GSM591762           | GSM591763           | GSM591767           | GSM591768            | GSM591769            | GSE24048        | Expression data from field droughted rice plants                                                                                |
| Drought, Bala leaf                          | GSM591764           | GSM591765           | GSM591766           | GSM591770           | GSM591771            | GSM591772            | GSE24048        | Expression data from field droughted rice plants                                                                                |
| Drought, IR64                               | E_MEXP_2401_I<br>NA | E_MEXP_2401_<br>INB | E_MEXP_2401_<br>INC | E_MEXP_2401_I<br>SA | E_MEXP_2401_<br>_ISB | E_MEXP_2401_<br>_ISC | E-MEXP-<br>2401 | Transcription profiling of Oryza sativa subtypes Cultivar Nagina-22 (N22) and IR64 subtypes under normal and drought conditions |
| Drought, N22                                | E_MEXP_2401_<br>NNA | E_MEXP_2401_<br>NNB | E_MEXP_2401_<br>NNC | E_MEXP_2401_N<br>SA | E_MEXP_2401_<br>_NSB | E_MEXP_2401_<br>_NSC | E-MEXP-<br>2401 | Transcription profiling of Oryza sativa subtypes Cultivar Nagina-22 (N22) and IR64 subtypes under normal and drought conditions |
| Drought, leaves at tillering stage          | GSM645322           | GSM645323           | GSM645324           | GSM645325           | GSM645326            | GSM645327            | GSE26280        | Genome-wide temporal-spatial gene expression profiling of drought responsiveness in rice                                        |
| Drought, leaves at panicle elongation stage | GSM645334           | GSM645335           | GSM645336           | GSM645337           | GSM645338            | GSM645339            | GSE26280        | Genome-wide temporal-spatial gene expression profiling of drought responsiveness in rice                                        |
| Drought, leaves at booting stage            | GSM645346           | GSM645347           | GSM645348           | GSM645349           | GSM645350            | GSM645351            | GSE26280        | Genome-wide temporal-spatial gene expression profiling of drought responsiveness in rice                                        |
